# Supplementary material
Source: publisher site journal article supplement (https://www.kjim.org/upload/media/kjim-2020-014-suppl2.pdf)
Supplement: Supplementary file 1 [file kjim-2020-014-suppl2.pdf]

**Supplementary Table 2. LSC phenotype according to AML risk stratification based on NGS data**

| Combined risk <sup>a</sup> | Low           | Intermediate  | High          | p value |
|----------------------------|---------------|---------------|---------------|---------|
| Total no.                  | 7             | 19            | 12            | NA      |
| MPP-like LSC               | 2.58 ± 3.46   | 3.32 ± 6.90   | 5.55 ± 6.57   | 0.2699  |
| LMPP-like LSC              | 1.54 ± 2.23   | 2.95 ± 4.72   | 11.47 ± 10.20 | 0.0052  |
| GMP-like LSC               | 44.46 ± 34.23 | 52.18 ± 39.18 | 43.59 ± 23.24 | 0.7741  |
| <i>De novo</i> AML no.     | 7             | 15            | 6             | NA      |
| MPP-like LSC               | 2.58 ± 3.46   | 0.73 ± 1.69   | 3.74 ± 5.99   | 0.2739  |
| LMPP-like LSC              | 1.54 ± 2.23   | 3.37 ± 5.14   | 7.51 ± 6.36   | 0.0401  |
| GMP-like LSC               | 44.46 ± 34.23 | 64.89 ± 33.84 | 47.31 ± 27.00 | 0.2731  |
| Secondary AML no.          | 0             | 4             | 6             | NA      |
| MPP-like LSC               | NA            | 13.04 ± 10.61 | 7.36 ± 7.15   | 0.4762  |
| LMPP-like LSC              | NA            | 1.37 ± 2.49   | 15.44 ± 12.29 | 0.0871  |
| GMP-like LSC               | NA            | 4.50 ± 5.10   | 39.87 ± 20.63 | 0.0667  |

Values are presented as mean ± SD.

LSC, leukemic stem cell; AML, acute myeloid leukemia; NGS, next generation sequencing; NA, not applicable; MPP, multipotent progenitor; LMPP, lymphoid primed multipotent progenitor; GMP, granulocyte-monocyte progenitor.

<sup>a</sup>Combined risk refers to risk stratification based on available next generation sequencing data including TP53, ASXL1, RUNX1 mutation status.
